1 **TITLE**

2 **Crystal structure of human endothelin ET<sub>B</sub> receptor in complex**  
3 **with peptide inverse agonist IRL2500.**

4 Chisae Nagiri<sup>1\*</sup>, Wataru Shihoya<sup>1\*‡</sup>, Asuka Inoue<sup>2</sup>, Francois Marie Ngako Kadji<sup>2</sup>, Junken  
5 Aoki<sup>2</sup>, Osamu Nureki<sup>1‡</sup>.

6

7 **Affiliations:**

8 <sup>1</sup> *Department of Biological Sciences, Graduate School of Science, The University of Tokyo,*  
9 *Bunkyo, Tokyo 113-0033, Japan.*

10 <sup>2</sup> *Graduate School of Pharmaceutical Sciences, Tohoku University, 6-3, Aoba, Aramaki,*  
11 *Aoba-ku, Sendai, Miyagi 980-8578, Japan.*

12

13 \*These authors contributed equally to this work.

14 ‡To whom correspondence should be addressed. E-mail: [wtrshh9@gmail.com](mailto:wtrshh9@gmail.com) (W.S.),

15 [nureki@bs.s.u-tokyo.ac.jp](mailto:nureki@bs.s.u-tokyo.ac.jp) (O.N.)

16 **Abstract**

17           Endothelin receptors (ET<sub>A</sub> and ET<sub>B</sub>) are G-protein coupled receptors activated  
18 by endothelin-1 and are involved in blood pressure regulation. IRL2500 is a peptide-  
19 mimetic of the C-terminal tripeptide of endothelin-1, and has been characterized as a  
20 potent ET<sub>B</sub>-selective antagonist, which has preventive effects against brain edema. Here,  
21 we report the crystal structure of the human ET<sub>B</sub> receptor in complex with IRL2500 at  
22 2.7 Å-resolution. The structure revealed the different binding modes between IRL2500  
23 and ET-1, and provides structural insights into its ET<sub>B</sub>-selectivity. Notably, the biphenyl  
24 group of IRL2500 penetrates into the transmembrane core proximal to D2.50, stabilizing  
25 the inactive conformation. Using the newly-established constitutively active mutant, we  
26 clearly demonstrate that IRL2500 functions as an inverse agonist for the ET<sub>B</sub> receptor.  
27 The current findings will expand the chemical space of ETR antagonists and facilitate the  
28 design of inverse agonists for other class A GPCRs.

## 29 **Main text**

### 30 **Introduction**

31 Endothelin receptors (ETR) are G-protein coupled receptors activated by vaso  
32 active peptide, endothelins<sup>1</sup>. Two endothelin receptor subtypes (ET<sub>A</sub> and ET<sub>B</sub>) are widely  
33 expressed in the vascular endothelium, brain, and other circulatory organs<sup>2,3</sup>. Endothelin-  
34 1 (ET-1) activates the endothelin receptors (ETRs) with sub-nanomolar affinities. The  
35 activation of the ET<sub>A</sub> receptor leads to potent and long-lasting vasoconstriction, whereas  
36 that of the ET<sub>B</sub> receptor induces nitric oxide-mediated vasorelaxation. Therefore, the up-  
37 regulation of ET-1 is significantly related to circulatory-system diseases, including  
38 pulmonary arterial hypertension (PAH)<sup>4,7</sup>. Moreover, the autocrine and paracrine  
39 signaling functions of ET-1 through the ET<sub>A</sub> receptor play a critical role in tumor growth  
40 and survival<sup>8</sup>. Therefore, ETR antagonists have been developed for the treatment of  
41 circulatory-system diseases and cancers<sup>6,7</sup>. Bosentan is the first orally-active ETR  
42 antagonist<sup>9,10</sup>, and is used to treat PAH. The ET<sub>B</sub> receptor is the prominent ET receptor  
43 subtype in the brain, with high expression levels in astrocytes<sup>11</sup>. Stimulation of the ET<sub>B</sub>  
44 receptor modulates astrocytic responses, indicating its important roles in regulating  
45 astrocytic functions<sup>12</sup>. The up-regulation of the astrocytic ET<sub>B</sub> receptor by ET-1 increases  
46 the vascular permeability and reduces the AQP4 levels, thereby aggravating vasogenic  
47 brain edema<sup>11</sup>. The application of ET<sub>B</sub>-selective antagonists may provide preventive  
48 effects against brain edema in the acute phase of brain insults<sup>13-16</sup>.

49 To date, most endothelin receptor antagonists have been developed based on  
50 bosentan<sup>17,18</sup>. The ETR antagonists that have been developed till now are mostly N-

51 heterocyclic sulfonamides with similar structures and molecular weights, and non-  
52 sulfonamide antagonists (atrasentan, ambrisentan, darusentan, and enrasentan) still retain  
53 high similarities with each other and with the sulfonamides<sup>7</sup>. Therefore, the ETR agents  
54 are chemically very similar, and expanded chemical space should be exploited. IRL2500  
55 is a peptide ETR antagonist developed based on the partial structure of ET-1<sup>19</sup>, rather than  
56 bosentan. IRL2500 has been characterized as an ET<sub>B</sub>-selective antagonist with an IC<sub>50</sub>  
57 value of 1.2 nM<sup>20</sup>, which shows higher affinity than that of bosentan. In an animal model,  
58 the intracerebroventricular administration of IRL2500 attenuated cold injury-mediated  
59 brain edema and disruption of the blood-brain barrier, indicating the neuroprotective  
60 effect of IRL2500<sup>14,15</sup>. An understanding of the IRL2500 binding mode would facilitate  
61 the expansion of the chemical space of ET agents.

62 We previously reported the crystal structures of the ET<sub>B</sub> receptor bound to ET-1<sup>21</sup>  
63 and bosentan<sup>22</sup>; however, both the binding mode and ET<sub>B</sub>-selectivity of IRL2500  
64 remained to be elucidated. Here, we present the crystal structure of the ET<sub>B</sub> receptor in  
65 complex with IRL2500. This structure revealed the unique binding mode of IRL2500,  
66 which differs from those of ET-1 and bosentan. Structure-guided functional analyses  
67 clearly demonstrate that IRL2500 functions as an inverse agonist for the ET<sub>B</sub> receptor,  
68 and thus will provide the basis for design of inverse agonists for other class A GPCRs.

69

70



## 71 **Results**

### 72 **Overall structure**

73 For crystallization, we used the previously established, thermostabilized ET<sub>B</sub>  
74 receptor (ET<sub>B</sub>-Y4)<sup>22,23</sup>. The IC<sub>50</sub> value of IRL2500 for ET<sub>B</sub>-Y4 was similar to that for the  
75 wild type receptor in the TGF $\alpha$  shedding assay<sup>24</sup> (Fig. 1), suggesting that the  
76 thermostabilizing mutations minimally affect the IRL2500 binding. In contrast, the IC<sub>50</sub>  
77 value of IRL2500 for the ET<sub>A</sub> receptor is over 3  $\mu$ M (Fig. 1), indicating that IRL2500 has  
78 over 100-fold ET<sub>B</sub>-selectivity, consistent with the previous pharmacological analysis<sup>20</sup>.  
79 To facilitate crystallization, we replaced the third intracellular loop (ICL3) of the receptor  
80 with minimal T4 Lysozyme<sup>25</sup> (ET<sub>B</sub>-Y4-mT4L). Using *in meso* crystallization<sup>26</sup>, we  
81 obtained crystals of ET<sub>B</sub>-Y4-mT4L in complex with IRL2500 (Supplementary Fig. 1a, b).  
82 In total, 58 datasets were collected and merged by the data processing system KAMO<sup>27</sup>.  
83 Eventually, we determined the ET<sub>B</sub> structure in complex with IRL2500 at 2.7  $\text{\AA}$  resolution,  
84 by molecular replacement using the antagonist-bound ET<sub>B</sub> structure (PDB code: 5X93)  
85 (Table 1).

86 The overall structure consists of the canonical 7 transmembrane helices (TM), the  
87 amphipathic helix 8 at the C-terminus (H8), and two antiparallel  $\beta$ -strands in the  
88 extracellular loop 2 (ECL2), as in the previously determined ET<sub>B</sub> structures (Fig. 2a). The  
89 IRL2500-bound structure is similar to the bosentan-bound structure, rather than the ET-  
90 1-bound structure (R.M.S.D. values for C $\alpha$  atoms=1.34 and 1.95  $\text{\AA}$ , respectively),  
91 reflecting the inactive conformation. We observed a remarkable difference in the  
92 conformation of ECL2. The  $\beta$  strands are opened up by 9  $\text{\AA}$ , as compared with those in

93 the ligand-free structure (Fig. 2b and Supplementary Fig. 2a), and are the widest among  
94 the peptide-activated class A GPCRs (Supplementary Fig. 2b). This structural feature  
95 indicates the innate flexibility of ECL2, to capture the large peptide ligand endothelin, in  
96 the inactive conformation of the ET<sub>B</sub> receptor.

97

## 98 **IRL2500 binding site**

99 We first describe the IRL2500 binding mode. IRL2500 consists of a tryptophan,  
100 a 3,5-dimethylbenzoyl group, and a biphenyl group<sup>19</sup>, which are connected by two peptide  
101 bonds (Fig. 2c). IRL2500 binds to the transmembrane binding cleft exposed to the  
102 extracellular side, with a clear electron density in the  $F_o - F_c$  omit map (Supplementary  
103 Fig. 3a, b). The carboxylate group of the tryptophan moiety in IRL2500 forms salt bridges  
104 with K182<sup>3.33</sup> and R343<sup>6.55</sup> (superscripts indicate Ballesteros–Weinstein numbers<sup>28</sup>) (Fig.  
105 2c, d). The tryptophan side chain of IRL2500 hydrogen bonds with the carbonyl group of  
106 the N158<sup>2.61</sup> side chain, and forms extensive van der Waals interactions with N158<sup>2.61</sup>,  
107 K161<sup>2.64</sup>, V177<sup>3.28</sup>, P178<sup>3.29</sup>, and F240<sup>4.64</sup> (Fig. 2d). The dimethyl phenyl group of  
108 IRL2500 forms van der Waals interactions with the hydrophobic pocket, and is  
109 surrounded by V185<sup>3.36</sup>, L277<sup>5.42</sup>, Y281<sup>5.46</sup>, W336<sup>6.48</sup>, L339<sup>6.51</sup>, and H340<sup>6.52</sup>. The  
110 biphenyl group penetrates deeply into the receptor core proximal to D147<sup>2.50</sup>, and forms  
111 van der Waals interactions with D147<sup>2.50</sup>, H150<sup>2.53</sup>, W336<sup>6.48</sup>, and S376<sup>7.43</sup>. Overall, the  
112 carboxylate of IRL2500 is specifically recognized by the positively charged residues of  
113 the ET<sub>B</sub> receptor, and the other moieties fill the space within the transmembrane binding  
114 pocket.

115 To elucidate the structural basis for the ET<sub>B</sub>-selectivity of IRL2500, we compared

116 the residues constituting the IRL2500 binding site between the ET<sub>B</sub> and ET<sub>A</sub> receptors  
117 (Fig. 3a and Supplementary Fig. 4). Although most of the residues are conserved, three  
118 residues are replaced with bulkier residues in the ET<sub>A</sub> receptor (H150Y, V177F, and  
119 S376T). These replacements may cause steric clashes with the aromatic groups of  
120 IRL2500 and reduce its affinity. To investigate this hypothesis, we measured the IC<sub>50</sub>  
121 values of IRL2500 for the H150Y, V177F, and S346T ET<sub>B</sub> receptor mutants. These  
122 mutants showed similar responses for ET-1 in the TGF $\alpha$  shedding assay (Supplementary  
123 Fig. 5), and only V177F showed a 4-fold higher IC<sub>50</sub> value with IRL2500 (Fig. 3b). These  
124 data suggest that the V177F mutation in the ET<sub>A</sub> receptor sterically clashes with the  
125 tryptophan moiety of IRL2500 and reduces its affinity, thus partially accounting for the  
126 ET<sub>B</sub>-selectivity of IRL2500. This is consistent with the previous study, in which the  
127 replacement of the tryptophan moiety with the smaller valine residue in IRL2500  
128 weakened its ET<sub>B</sub>-selectivity<sup>29</sup>.

129

### 130 **Comparison of the binding modes of IRL2500, ET-1, and bosentan**

131 IRL2500 is designed to mimic the Y13, F14, I19, I20, and W21 residues in ET-  
132 1, which play critical roles in ligand binding to the ET<sub>B</sub> receptor<sup>19</sup>. The tryptophan and  
133 dimethyl phenyl group of IRL2500 seem to be equivalent to W21 and I20 in ET-1,  
134 respectively, while the biphenyl group of IRL2500 seems to be equivalent to F14 and I19  
135 of ET-1. However, a comparison between IRL2500 and ET-1 binding revealed an  
136 unexpected difference in their binding interactions (Fig. 4a). The carboxylate of the  
137 tryptophan in IRL2500 superimposes well with that of W21 in ET-1, and is coordinated  
138 by similar positively charged residues. The tryptophan moiety and dimethyl phenyl group

139 of IRL2500 superimpose well with I20 and W21 of ET-1, respectively. In contrast, the  
140 biphenyl group of IRL2500 penetrates into the receptor core, in an opposite manner to  
141 the F14 and I19 of ET-1. Overall, the electrostatic interactions between the carboxylates  
142 and the positively charged residues are conserved in IRL2500 and ET-1 binding, but the  
143 other moieties form totally distinct interactions with the receptor. The volume of the  
144 ligand binding pocket in the ligand-free structure is large, thereby allowing the aromatic  
145 moieties of IRL2500 to flip.

146 IRL2500 has distinct chemical moieties as compared with bosentan, because  
147 IRL2500 was not developed based on bosentan. To reveal the similarities and differences  
148 in their binding modes, we compared the binding modes of IRL2500 and bosentan in  
149 detail (Fig. 4b, c). The carboxylate of IRL2500 and the sulfonamide of bosentan are  
150 similarly coordinated by the positively charged residue R343<sup>6,55</sup>, suggesting that this  
151 electrostatic interaction is a common feature of the antagonist binding to the ET<sub>B</sub> receptor.  
152 In addition, like bosentan, the aromatic moieties of IRL2500 fit within the local  
153 hydrophobic pockets in the ET<sub>B</sub> receptor. Overall, IRL2500 has moieties that form similar  
154 binding interactions to those of bosentan. However, bosentan lacks the moiety  
155 corresponding to the biphenyl group of IRL2500, which deeply penetrates into the  
156 receptor core. Thus, IRL2500 fits into the pocket more tightly as compared with bosentan,  
157 contributing to its higher affinity.

158

### 159 **IRL2500 function an inverse agonist for ET<sub>B</sub>**

160 To obtain mechanistic insights into the receptor inactivation by IRL2500, we  
161 compared the ET<sub>B</sub> structures bound to ET-1, bosentan, and IRL2500. Previous structural

162 studies showed that ET-1 binding induces the inward motion of the extracellular portion  
163 of TM6 including W336<sup>6,48</sup>, leading to receptor activation on the intracellular side<sup>21</sup> (Fig.  
164 5a). Bosentan binding sterically prevents the inward motion of W336<sup>6,48</sup> with its 2-  
165 methoxyphenoxy group, and thus functions as an antagonist<sup>22</sup> (Fig. 5b). The  
166 dimethylphenyl group of IRL2500 superimposes well with the 2-methoxyphenoxy group  
167 of bosentan and similarly prevents the inward motion. Moreover, the dimethyl phenyl and  
168 biphenyl groups of IRL2500 sandwich the W336<sup>6,48</sup> side chain, tightly preventing its  
169 inward rotation. These observations suggest that IRL2500 strongly prevents the transition  
170 to the active state, as compared with bosentan, thereby possibly working as an inverse  
171 agonist that reduces the basal activity.

172 To investigate the inverse agonist activity of IRL2500 for the ET<sub>B</sub> receptor, we  
173 first measured ligand-induced AP-TGF $\alpha$  release responses. The EC<sub>50</sub> value of the agonist  
174 ET-1 was 0.11 nM, while IRL2500 and the antagonist bosentan did not change the  
175 receptor activation level (Fig. 5c). These data suggested that IRL2500 does not have the  
176 inverse agonist activity or that the assay is not sensitive enough to detect inverse agonist  
177 activity. Indeed, we observed that the basal activity of the ET<sub>B</sub> receptor was very low in  
178 the assay (Fig. 5d) and thus we could not distinguish whether IRL2500 functions as an  
179 antagonist or an inverse agonist by this assay.

180 Therefore, we tried the same assay using a constitutively active mutant of the ET<sub>B</sub>  
181 receptor. Constitutively active mutant GPCRs have been employed in pharmacological  
182 characterizations of inverse agonists<sup>30</sup>, because such mutant GPCRs allow the assay to  
183 measure signals in a larger detection window. The substitution of the highly conserved  
184 L3.43 to glutamine has been identified as a causative activating mutation in the TSHR<sup>31</sup>

185 and CYSLTR2<sup>32</sup> genes, which are related to hyperthyroidism and uveal melanoma,  
186 respectively. Therefore, we transferred the L3.43Q mutation into ET<sub>B</sub> (ET<sub>B</sub>-L192<sup>3.43</sup>Q)  
187 and examined its constitutive activity. We found that ET<sub>B</sub>-L3.43Q induced spontaneous  
188 AP-TGF $\alpha$  release in a plasmid volume-dependent manner (Fig. 5d), indicating that  
189 L3.43Q works as a constitutive active mutation in the ET<sub>B</sub> receptor. We evaluated the  
190 dose response effects of bosentan and IRL2500, using the constitutive active mutant ET<sub>B</sub>-  
191 L3.43Q (Fig. 5e). Again, the antagonist bosentan did not change the receptor activation  
192 from the baseline level, whereas IRL2500 reduced the basal activity (EC<sub>50</sub>=1.2 nM).  
193 These data indicate that IRL2500 works as a potent inverse agonist for the ET<sub>B</sub> receptor,  
194 consistent with the structural observations. The biphenyl group of IRL2500 prevents the  
195 inward motion of W336<sup>6.48</sup> and stabilizes the inactive conformation, and thus IRL2500  
196 functions as an inverse agonist.

197

198

199

200

201

202

203

204

205

## 206 **Discussion**

207           We have determined the crystal structure of the ET<sub>B</sub> receptor in complex with the  
208 peptide compound IRL2500, and thus elucidated the detailed receptor interactions and  
209 the structural basis for its ET<sub>B</sub> selectivity. Although IRL2500 is designed to mimic the  
210 partial structure of ET-1, the binding mode is quite different. Moreover, using the  
211 constitutively active mutant that we established in the current study, we first revealed that  
212 IRL2500 functions as a potent inverse agonist for the ET<sub>B</sub> receptor, and provided the  
213 structural basis for the inverse agonistic mechanism.

214           Small-molecule ETR antagonists have been developed over the years; however,  
215 most ETR antagonists have been designed based on bosentan. Thus, the presently  
216 available ET agents are chemically very similar. IRL2500 was developed based on ET-1  
217 and has totally distinct chemical moieties, as compared with bosentan. However, the  
218 comparison of the IRL2500 and bosentan binding modes revealed the unexpected  
219 similarity in their binding interactions. This observation suggests that the charge-  
220 complementary interactions in the center of the pocket form the core of the receptor-  
221 antagonist interactions, and the other aromatic moieties fit the local hydrophobic pocket.  
222 The ligand binding pocket in the inactive ET<sub>B</sub> structures is larger than those in other  
223 GPCR structures, and thus aromatic moieties may be necessary to fit well within the  
224 pocket.

225           We revealed that the biphenyl group of IRL2500 penetrates deeply into the  
226 receptor core proximal to D147<sup>2.50</sup>, preventing the inward motion of W336<sup>6.48</sup> in TM6,  
227 and thus IRL2500 functions as an inverse agonist (Fig. 6a). This D2.50 constitutes a

228 sodium binding site adjacent to the orthosteric site, which is highly conserved among the  
229 class A GPCRs<sup>33</sup>. Sodium has negative allosteric effects on ligand binding in most class  
230 A GPCRs, by stabilizing the inactive conformations. Therefore, this sodium binding site  
231 is the hot spot for the design of allosteric modulators and inverse agonists to fix receptors  
232 in the inactive conformations. In the BLT1 structure bound to the inverse agonist BIIL260,  
233 the benzamidine group of BIIL260 directly hydrogen bonds with D2.50, stabilizing the  
234 inactive conformation instead of the sodium<sup>34</sup> (Fig. 6b). The biphenyl group of IRL2500  
235 superimposes well with the benzamidine group of BIIL260 (Fig. 6c). Although the  
236 biphenyl group of IRL2500 does not form any hydrogen-bonding interactions with the  
237 receptor, it prevents the conformational change around the D2.50 in a similar manner to  
238 the benzamidine moiety of BIIL260. For the design of effective inverse agonists, the  
239 biphenyl moiety would be also useful as a modulation part along with another moiety that  
240 exerts specific and tight binding to the orthosteric site, as well as a benzamidine group.

241

242

243

244

245

246

247



248 **Materials and methods**

249 **Expression and purification**

250 The haemagglutinin signal peptide, followed by the Flag epitope tag  
251 (DYKDDDDK) and a nine-amino-acid linker, was added to the N-terminus of the  
252 receptor, and a tobacco etch virus (TEV) protease recognition sequence was introduced  
253 between G57 and L66, to remove the disordered N-terminus during the purification  
254 process. The C-terminus was truncated after S407, and three cysteine residues were  
255 mutated to alanine (C396A, C400A, and C405A) to avoid heterogeneous palmitoylation.  
256 To improve crystallogensis, we introduced four thermostabilizing mutations () and  
257 inserted minimal T4 lysozyme<sup>25</sup> into intracellular loop 3, between L303<sup>5,68</sup> and L311<sup>6,23</sup>  
258 (ET<sub>B</sub>-Y4-mT4L<sup>22</sup>).

259 The thermostabilized construct ET<sub>B</sub>-Y4-mT4L was subcloned into a modified  
260 pFastBac vector, with the resulting construct encoding a TEV cleavage site followed by  
261 a GFP-His<sup>10</sup> tag at the C-terminus. The recombinant baculovirus was prepared using the  
262 Bac-to-Bac baculovirus expression system (Invitrogen). Sf9 insect cells were infected  
263 with the virus at a cell density of  $4.0 \times 10^6$  cells per millilitre in Sf900 II medium, and  
264 grown for 48 h at 27 °C. The harvested cells were disrupted by sonication, in buffer  
265 containing 20 mM Tris-HCl, pH 7.5, and 20% glycerol. The crude membrane fraction  
266 was collected by ultracentrifugation at 180,000g for 1 h. The membrane fraction was  
267 solubilized in buffer, containing 20 mM Tris-HCl, pH 7.5, 200 mM NaCl, 1% DDM,  
268 0.2% cholesterol hemisuccinate, 10 μM IRL2500, and 2 mg ml<sup>-1</sup> iodoacetamide, for  
269 1 h at 4 °C. The supernatant was separated from the insoluble material by

270 ultracentrifugation at 180,000g for 20 min, and incubated with TALON resin  
271 (Clontech) for 30 min. The resin was washed with ten column volumes of buffer,  
272 containing 20 mM Tris-HCl, pH 7.5, 500 mM NaCl, 0.1% LMNG, 0.01% CHS, 10  $\mu$ M  
273 IRL2500, and 15 mM imidazole. The receptor was eluted in buffer, containing 20 mM  
274 Tris-HCl, pH 7.5, 500 mM NaCl, 0.01% LMNG, 0.001% CHS, 10  $\mu$ M IRL2500, and  
275 200 mM imidazole. The eluate was treated with TEV protease and dialysed against  
276 buffer (20 mM Tris-HCl, pH 7.5, 500 mM NaCl, and 10  $\mu$ M IRL2500). The cleaved  
277 GFP-His<sub>10</sub> tag and the TEV protease were removed with Co<sup>2+</sup>-NTA resin. The receptor  
278 was concentrated and loaded onto a Superdex200 10/300 Increase size-exclusion  
279 column, equilibrated in buffer containing 20 mM Tris-HCl, pH 7.5, 150 mM NaCl,  
280 0.01% LMNG, 0.001% CHS, and 10  $\mu$ M IRL2500. Peak fractions were pooled,  
281 concentrated to 40 mg ml<sup>-1</sup> using a centrifugal filter device (Millipore 50 kDa MW  
282 cutoff), and frozen until crystallization. During the concentration, IRL2500 was added  
283 to a final concentration of 100  $\mu$ M.

284

## 285 **Crystallization**

286 The purified receptor was reconstituted into molten lipid (monoolein and  
287 cholesterol 10:1 by mass) at a weight ratio of 1:1.5 (protein:lipid). The protein-laden  
288 mesophase was dispensed into 96-well glass plates in 30 nl drops and overlaid with 800  
289 nl precipitant solution by a Gryphon LCP robot (Art Robbins Instruments)<sup>26</sup>. Crystals of  
290 ET<sub>B</sub>-Y4-mT4L bound to IRL2500 were grown at 20°C in precipitant conditions  
291 containing 30% PEG300, 100 mM Bis-tris, pH 7.5, 150 mM sodium phosphate  
292 monobasic, and 10 mM TCEP hydrochloride. The crystals were harvested directly from

293 the LCP using micromounts (MiTeGen) or LithoLoops (Protein Wave) and frozen in  
294 liquid nitrogen, without adding any extra cryoprotectant.

295

## 296 **Data collection and structure determination**

297 X-ray diffraction data were collected at the SPring-8 beamline BL32XU, with 10  
298  $\times 15 \mu\text{m}^2$  (width  $\times$  height) micro-focused beams and an EIGER X 9M detector (Dectris).  
299 Various wedge data sets ( $10^\circ$ ) per crystal were mainly collected with the ZOO system, an  
300 automatic data-collection system developed at SPring-8 (K.Y., G.U., K.H., M.Y., and  
301 K.H., submitted). The loop-harvested microcrystals were identified by raster scanning  
302 and subsequently analyzed by SHIKA<sup>35</sup>. Each data set was indexed and integrated with  
303 XDS<sup>36</sup>, and the datasets were hierarchically clustered by using the correlation coefficients  
304 of the intensities between datasets. After the rejection of outliers, 58 data sets were finally  
305 merged with XSCALE<sup>36</sup>. The IRL2500-bound structure was determined by molecular  
306 replacement with PHASER<sup>37</sup>, using the K8794-bound ET<sub>B</sub> structure (PDB code: 5X93).  
307 Subsequently, the model was rebuilt and refined using COOT<sup>38</sup> and PHENIX<sup>39</sup>,  
308 respectively. The final model of IRL2500-bound ET<sub>B</sub>-Y4-T4L contained residues 91-207,  
309 214-303, and 311-403 of ET<sub>B</sub>, 1-14 and 22-117 of mT4L, IRL2500, 6 monoolein  
310 molecules, two phosphoric acids, and 41 water molecules. The model quality was  
311 assessed by MolProbity<sup>40</sup>. Figures were prepared using CueMol  
312 (<http://www.cuemol.org/ja/>)

313

## 314 **TGF $\alpha$ shedding assay**

315           The TGF $\alpha$  shedding assay, which measures the activation of G $\alpha_q$  and G $\alpha_{12}$   
316 signaling<sup>24</sup>, was performed as described previously<sup>22</sup>. Briefly, a plasmid encoding an ET $_B$   
317 construct with an internal FLAG epitope tag or an ET $_A$  construct was transfected, together  
318 with a plasmid encoding alkaline phosphatase (AP)-tagged TGF $\alpha$  (AP-TGF $\alpha$ ), into  
319 HEK293A cells by using a polyethylenimine (PEI) transfection reagent (1  $\mu$ g ETR  
320 plasmid, 2.5  $\mu$ g AP-TGF $\alpha$  plasmid, and 25  $\mu$ l of 1 mg/ml PEI solution per 10-cm culture  
321 dish). After a one day culture, the transfected cells were harvested by trypsinization,  
322 washed, and resuspended in 30 ml of Hank's Balanced Salt Solution (HBSS) containing  
323 5 mM HEPES (pH 7.4). The cell suspension was seeded in a 96 well plate (cell plate) at  
324 a volume of 80  $\mu$ l per well and incubated for 30 min in a CO $_2$  incubator. For the  
325 measurement of antagonist activity, IRL2500 was diluted in 0.01% bovine serum albumin  
326 (BSA) and HEPES-containing HBSS (assay buffer) and added to the cell plate at a volume  
327 of 10  $\mu$ l per well. After 5 min, ET-1, at a final concentration of 0.2 nM, was added to the  
328 cell plate at a volume of 10  $\mu$ l per well. For the measurement of agonistic activity, after  
329 adding 10  $\mu$ l of the assay buffer, serially diluted ET-1 was mixed with the cells at a volume  
330 of 10  $\mu$ l per well. After a 1 h incubation in the CO $_2$  incubator, aliquots of the conditioned  
331 media (80  $\mu$ l) were transferred to an empty 96-well plate (conditioned media (CM) plate).  
332 Similarly, for the measurement of inverse agonist activity, the cells were mixed with 10  
333  $\mu$ l of the assay buffer, followed by the addition of serially diluted IRL2500, and incubated  
334 for 4 h before the transfer of the conditioned media. The AP reaction solution (10 mM *p*-  
335 nitrophenylphosphate (*p*-NPP), 120 mM Tris-HCl (pH 9.5), 40 mM NaCl, and 10 mM

336 MgCl<sub>2</sub>) was dispensed into the cell plates and the CM plates (80 µl per well). The  
337 absorbance at 405 nm (Abs<sub>405</sub>) of the plates was measured, using a microplate reader  
338 (SpectraMax 340 PC384, Molecular Devices), before and after a 1 h incubation at room  
339 temperature. AP-TGFα release was calculated as described previously<sup>22</sup>. The AP-TGFα  
340 release signals were fitted to a four-parameter sigmoidal concentration-response curve,  
341 using the Prism 7 software (GraphPad Prism), and the pEC<sub>50</sub> (equal to -Log<sub>10</sub> EC<sub>50</sub>) and  
342 E<sub>max</sub> values were obtained.

343 To measure the constitutive activity in a plasmid volume-dependent manner,  
344 HEK293 cells were seeded in a 96-well plate at a concentration of 4 x 10<sup>5</sup> cells per ml in  
345 Opti-MEM I Reduced Serum Media (Thermo Fisher Scientific), in a volume of 80 µl per  
346 well. A transfection mixture was prepared by mixing the PEI transfection reagent (0.2 µl  
347 per well) and plasmids (20 ng AP-TGFα plasmid, titrated ETR plasmid, and an empty  
348 vector to balance the total plasmid volume) in Opti-MEM I Reduced Serum Media (20  
349 µl). The mixture was added to the cells, which were then incubated for 24 h before the  
350 transfer of the conditioned media. After adding the AP reaction solution, the absorbances  
351 of the cells and the CM plates were measured at 20 min intervals. The AP-TGFα release  
352 signals were calculated as described above, and the signal in the mock-transfected  
353 conditions was set at the baseline.

354

355

356

## 357 **Acknowledgements**

358           The diffraction experiments were performed at SPring-8 BL32XU (proposal  
359 2017A2527). We thank the beamline staff at BL32XU of SPring-8 (Sayo, Japan) for  
360 technical assistance during data collection. We also thank Kouki Kawakami, Takeaki  
361 Shibata and Ayumi Inoue (Tohoku University, Japan) for technical assistance in the  
362 characterization of the L3.43Q-mutant ET<sub>B</sub> receptor. This work was supported by grants  
363 from the Platform for Drug Discovery, Informatics and Structural Life Science by the  
364 Ministry of Education, Culture, Sports, Science and Technology (MEXT), JSPS  
365 KAKENHI grants 16H06294 (O.N.), 17J30010 (W.S.), 30809421 (W.S.), 17K08264  
366 (A.I.), and the Japan Agency for Medical Research and Development (AMED) grants:  
367 the PRIME JP17gm5910013 (A.I.) and the LEAP JP17gm0010004 (A.I. and J.A.), and  
368 the National Institute of Biomedical Innovation.

369

## 370 **Author contributions**

371           C.N. expressed, purified, and crystallized the IRL2500-bound ET<sub>B</sub> receptor,  
372 collected data, and refined the structures. W.S. designed all of the experiments, initially  
373 crystallized the receptor, and refined the structure. A.I., F.M.N.K., and J.A. performed  
374 and oversaw the cell-based assays. The manuscript was prepared by C.N., W.S., A.I., and  
375 O.N. W.S. and O.N. supervised the research. Coordinates and structure factors have been  
376 deposited in the Protein Data Bank, under the accession number XXXX for the IRL2500-  
377 bound structure. The X-ray diffraction images are also available at SBCGrid Data Bank  
378 (<https://data.sbgrid.org/>), under the ID YYYY.

379

380 **Competing interests**

381 The authors declare no competing interests

382 **References**

383

- 384 1. Yanagisawa, M. *et al.* A novel potent vasoconstrictor peptide produced by  
385 vascular endothelial cells. *Nature* **332**, 411–415 (1988).
- 386 2. Arai, H. *et al.* Cloning and expression of a cDNA encoding an endothelin  
387 receptor. *Nature* **348**, 730–732 (1990).
- 388 3. Sakurai, T. *et al.* Cloning of a cDNA encoding a non-isopeptide-selective  
389 subtype of the endothelin receptor. *Nature* **348**, 732–735 (1990).
- 390 4. Channick, R. N. *et al.* Effects of the dual endothelin-receptor antagonist bosentan  
391 in patients with pulmonary hypertension: a randomised placebo-controlled study.  
392 *Lancet* **358**, 1119–1123 (2001).
- 393 5. Rubin, L. J. *et al.* Bosentan therapy for pulmonary arterial hypertension. *N. Engl.*  
394 *J. Med.* **346**, 896–903 (2002).
- 395 6. Maguire, J. J. & Davenport, A. P. Endothelin@25 - new agonists, antagonists,  
396 inhibitors and emerging research frontiers: IUPHAR Review 12. *Br. J.*  
397 *Pharmacol.* **171**, 5555–5572 (2014).
- 398 7. Davenport, A. P. *et al.* Endothelin. *Pharmacol. Rev.* **68**, 357–418 (2016).
- 399 8. Rosanò, L., Spinella, F. & Bagnato, A. Endothelin 1 in cancer: biological  
400 implications and therapeutic opportunities. *Nat. Rev. Cancer* **13**, 637–651 (2013).
- 401 9. Clozel, M. *et al.* Pathophysiological role of endothelin revealed by the first orally  
402 active endothelin receptor antagonist. *Nature* **365**, 759–761 (1993).
- 403 10. Clozel, M. *et al.* Pharmacological characterization of bosentan, a new potent  
404 orally active nonpeptide endothelin receptor antagonist. *J. Pharmacol. Exp. Ther.*  
405 **270**, 228–235 (1994).
- 406 11. Koyama, Y. & Michinaga, S. Regulations of Astrocytic Functions by  
407 Endothelins: Roles in the Pathophysiological Responses of Damaged Brains. *J.*  
408 *Pharmacol. Sci.* **118**, 401–407 (2012).
- 409 12. Hammond, T. R. *et al.* Endothelin-B Receptor Activation in Astrocytes Regulates  
410 the Rate of Oligodendrocyte Regeneration during Remyelination. *Cell Rep.* **13**,  
411 2090–2097 (2015).
- 412 13. Moldes, O. *et al.* Neuroprotection afforded by antagonists of endothelin-1  
413 receptors in experimental stroke. *Neuropharmacology* **63**, 1279–1285 (2012).
- 414 14. Michinaga, S. *et al.* Amelioration of Cold Injury-Induced Cortical Brain Edema  
415 Formation by Selective Endothelin ETB Receptor Antagonists in Mice. *PLoS*



- 416 *One* **9**, e102009 (2014).
- 417 15. Michinaga, S. *et al.* Improvement of cold injury-induced mouse brain edema by  
418 endothelin ET<sub>B</sub> antagonists is accompanied by decreases in  
419 matrixmetalloproteinase 9 and vascular endothelial growth factor-A. *Eur. J.*  
420 *Neurosci.* **42**, 2356–2370 (2015).
- 421 16. Michinaga, S. *et al.* Delayed Administration of BQ788, an ET<sub>B</sub> Antagonist, after  
422 Experimental Traumatic Brain Injury Promotes Recovery of Blood–Brain Barrier  
423 Function and a Reduction of Cerebral Edema in Mice. *J. Neurotrauma* **35**, 1481–  
424 1494 (2018).
- 425 17. Palmer, M. J. Endothelin Receptor Antagonists: Status and Learning 20 Years  
426 On. *Prog. Med. Chem.* **47**, 203–237 (2009).
- 427 18. Mucke, H. A. M. Small-molecule endothelin receptor antagonists: a review of  
428 patenting activity across therapeutic areas. *IDrugs* **12**, 366–375 (2009).
- 429 19. Friih, T. *et al.* IRL 2500: A potent ET<sub>B</sub> selective endothelin antagonist.  
430 *Bioorganic Med. Chem. Lett.* **6**, 2323–2328 (1996).
- 431 20. Balwierczak, J. L. *et al.* Characterization of a potent and selective endothelin-B  
432 receptor antagonist, IRL 2500. *J. Cardiovasc. Pharmacol.* **26 Suppl 3**, S393-6  
433 (1995).
- 434 21. Shihoya, W. *et al.* Activation mechanism of endothelin ET<sub>B</sub> receptor by  
435 endothelin-1. *Nature* **537**, 363–368 (2016).
- 436 22. Shihoya, W. *et al.* X-ray structures of endothelin ET<sub>B</sub> receptor bound to clinical  
437 antagonist bosentan and its analog. *Nat. Struct. Mol. Biol.* **24**, 758–764 (2017).
- 438 23. Okuta, A. *et al.* Thermostabilization of the Human Endothelin Type B Receptor.  
439 *J. Mol. Biol.* **428**, 2265–2274 (2016).
- 440 24. Inoue, A. *et al.* TGF $\alpha$  shedding assay: an accurate and versatile method for  
441 detecting GPCR activation. *Nat. Methods* **9**, 1021–1029 (2012).
- 442 25. Thorsen, T. S. *et al.* Modified T4 Lysozyme Fusion Proteins Facilitate G Protein-  
443 Coupled Receptor Crystallogenesis. *Structure* **22**, 1657–1664 (2014).
- 444 26. Caffrey, M. & Cherezov, V. Crystallizing membrane proteins using lipidic  
445 mesophases. *Nat. Protoc.* **4**, 706–731 (2009).
- 446 27. Yamashita, K., Hirata, K. & Yamamoto, M. KAMO: towards automated data  
447 processing for microcrystals. *Acta Crystallogr. Sect. D Struct. Biol.* **74**, 441–449  
448 (2018).
- 449 28. Ballesteros, J. A. & Weinstein, H. Integrated methods for the construction of  
450 three-dimensional models and computational probing of structure-function

- 451 relations in G protein-coupled receptors. *Methods Neurosci.* **25**, 366–428 (1995).
- 452 29. Sakaki, J. *et al.* Discovery of IRL 3461: a novel and potent endothelin antagonist  
453 with balanced ET<sub>A</sub>/ET<sub>B</sub> affinity. *Bioorg. Med. Chem. Lett.* **8**, 2241–2246 (1998).
- 454 30. Soudijn, W., van Wijngaarden, I. & Ijzerman, A. P. Structure-activity  
455 relationships of inverse agonists for G-protein-coupled receptors. *Med. Res. Rev.*  
456 **25**, 398–426 (2005).
- 457 31. Trülsch, B. *et al.* Detection of thyroid-stimulating hormone receptor and  
458 Gsalpha mutations: in 75 toxic thyroid nodules by denaturing gradient gel  
459 electrophoresis. *J. Mol. Med.* **78**, 684–691 (2001).
- 460 32. Moore, A. R. *et al.* Recurrent activating mutations of G-protein-coupled receptor  
461 CYSLTR2 in uveal melanoma. *Nat. Genet.* **48**, 675–680 (2016).
- 462 33. Katritch, V. *et al.* Allosteric sodium in class A GPCR signaling. *Trends Biochem.*  
463 *Sci.* **39**, 233–244 (2014).
- 464 34. Hori, T. *et al.* Na<sup>+</sup>-mimicking ligands stabilize the inactive state of leukotriene  
465 B4 receptor BLT1. *Nat. Chem. Biol.* **14**, 262–269 (2018).
- 466 35. Ueno, G. *et al.* Remote access and automation of SPring-8 MX beamlines. in *AIP*  
467 *Conf. Proc.* **1741**, 050021 (2016).
- 468 36. Kabsch, W. *XDS*. *Acta Crystallogr. D Biol. Crystallogr.* **66**, 125–132 (2010).
- 469 37. McCoy, A. J. *et al.* Phaser crystallographic software. *J. Appl. Crystallogr.* **40**,  
470 658–674 (2007).
- 471 38. Emsley, P., Lohkamp, B., Scott, W. G. & Cowtan, K. Features and development  
472 of Coot. *Acta Crystallogr. D Biol. Crystallogr.* **66**, 486–501 (2010).
- 473 39. Adams, P. D. *et al.* PHENIX: a comprehensive Python-based system for  
474 macromolecular structure solution. *Acta Crystallogr. D Biol. Crystallogr.* **66**,  
475 213–221 (2010).
- 476 40. Chen, V. B. *et al.* MolProbity: all-atom structure validation for macromolecular  
477 crystallography. *Acta Crystallogr. D Biol. Crystallogr.* **66**, 12–21 (2010).
- 478
- 479
- 480
- 481
- 482

483 **Figure Legends**

484 **Fig. 1. Inhibition of ET-1 binding by IRL2500.**

485 Effect of IRL2500 on the ET-1 (0.2 nM)-induced release of AP-TGF $\alpha$  in HEK293 cells  
486 expressing the endothelin receptors. For each experiment, the AP-TGF $\alpha$  release response  
487 in the absence of IRL2500 is set at 100%. Data are displayed as means  $\pm$  s.e.m. (standard  
488 error of the mean) from seven to nine independent experiments, with each performed in  
489 triplicate.

490

491 **Fig. 2. ET<sub>B</sub> structure in complex with IRL2500.**

492 **a**, The overall structure of the IRL2500-bound ET<sub>B</sub> receptor. The receptor is shown as a  
493 sky blue ribbon model. IRL2500 is shown as a deep sky blue stick with a transparent  
494 surface model. **b**, Superimposition of the IRL2500-bound and ligand-free ET<sub>B</sub> structures  
495 (PDB code: 5GLI), colored sky blue and light green, respectively. **c**, Schematic  
496 representation of the interactions between ET<sub>B</sub> and IRL2500 within 4.5 Å. The dashed  
497 lines show hydrogen bonds. **d**, Binding pocket for IRL2500, viewed from the  
498 extracellular side (over) and the membrane plane (lower). The receptor is shown in a sky  
499 blue ribbon representation. IRL2500 and receptor residues involved in ligand binding are  
500 shown as sticks, coloured deep sky blue and sky blue, respectively. The dashed lines show  
501 hydrogen bonds.

502

503 **Fig. 3. Conservation of the IRL2500 binding site.**

504 **a**, Sequence conservation of the IRL2500 binding site between ET<sub>A</sub> and ET<sub>B</sub>, mapped  
505 onto the IRL2500-bound structure. Conserved and non-conserved residues are coloured  
506 sky blue and gray, respectively. The receptor residues involved in IRL2500 binding are  
507 shown as sticks. The dashed lines show hydrogen bonds. **b**, Effect of IRL2500 on the ET-  
508 1 (0.2 nM)-induced release of AP-TGF $\alpha$  in HEK293 cells expressing the mutant ET<sub>B</sub>  
509 receptors. For each experiment, the AP-TGF $\alpha$  release response in the absence of IRL2500  
510 is set at 100%. Data are displayed as means  $\pm$  s.e.m. (standard error of the mean) from  
511 four to six independent experiments, with each performed in triplicate.

512

513 **Fig. 4. Comparison of binding modes of IRL2500, ET-1, and bosentan.**

514 **a**, Superimposition of the IRL2500- and ET-1-bound ET<sub>B</sub> receptors (PDB code: 5GLH).  
515 The ET-1- and IRL2500-bound receptors are shown as pink and sky blue ribbons,  
516 respectively. IRL2500 is shown as a stick model. ET-1 is shown as a magenta ribbon with  
517 stick models of the peptide residues (Y13, F14, I19, I20, and W21). **b**, **c**, Binding pockets  
518 for bosentan (**b**) and IRL2500 (**c**). The bosentan-bound receptor (PDB code: 5XPR) is  
519 shown as a thin orange ribbon model. The residues involved in bosentan binding (D154<sup>2,57</sup>,  
520 Q181<sup>3,32</sup>, K182<sup>3,33</sup>, K273<sup>5,38</sup>, W336<sup>6,48</sup>, and R343<sup>6,55</sup>) and D147<sup>2,50</sup> are shown as sticks.  
521 Bosentan is shown as an orange stick model. IRL2500 and the IRL2500-bound receptor  
522 are coloured as in panel (**a**). The residues involved in IRL2500 binding (N158<sup>2,61</sup>,  
523 K182<sup>3,33</sup>, R343<sup>6,55</sup>, D147<sup>2,50</sup>, and W336<sup>6,48</sup>) are shown as sticks.

524

525 **Fig. 5. Inverse agonistic activity of IRL2500.**

526 **a, b**, Structural changes upon ET-1 and IRL2500 binding, as compared with the bosentan-  
527 bound structure, coloured as in Fig. 4. Black arrows indicate the inward movements of  
528 TM6 and W336<sup>6,48</sup>. **c**, Effects of IRL2500 and bosentan on the ET-1-induced AP-TGF $\alpha$   
529 release for the ET<sub>B</sub> receptor. Data are displayed as means  $\pm$  s.e.m. (standard error of the  
530 mean) from three to four independent experiments. **d**, Constitutive activity of ETB.  
531 HEK293 cells were transfected with titrated volume of a plasmid encoding the wild-type  
532 ET<sub>B</sub> (ET<sub>B</sub>-WT) or the L3.43Q-mutant ET<sub>B</sub> (ET<sub>B</sub>-L3.43Q) and accumulated AP-TGF $\alpha$   
533 release during 24 h after transfection was measured. AP-TGF $\alpha$  release signal in 0 ng  
534 receptor plasmid was set as a baseline. Data are displayed as means  $\pm$  s.e.m. from three  
535 independent experiments.. **e**, Effects of IRL2500 and bosentan on the ET-1-induced AP-  
536 TGF $\alpha$  release for the constitutive active ET<sub>B</sub> receptor (ET<sub>B</sub>-L3.43Q). Data are displayed  
537 as means  $\pm$  s.e.m. from three to four independent experiments.

538

539 **Fig. 6. Structural comparison of ET<sub>B</sub> and BLT1 in complex with inverse**  
540 **agonists.**

541 **a, b**, The overall structures of the IRL2500-bound ET<sub>B</sub> receptor (**a**) and the BIIL260-  
542 bound BLT1 receptor (PDB code: 5X33) (**b**). The ET<sub>B</sub> and BLT1 receptors are shown as  
543 sky blue and light green ribbons, respectively. The inverse agonists IRL2500 and BIIL260  
544 are shown as blue and dark green sticks, respectively. The lower panels show the binding  
545 interactions around the sodium binding site. The residues involved in ligand binding are  
546 represented with sticks. Hydrogen bonds are indicated by black dashed lines. In the

547 IRL2500-bound structure, the biphenyl group of IRL2500 forms van der Waals  
548 interactions with the receptor, and does not form any hydrogen-binding interactions. In  
549 the BIIL260 structure, BIIL260 forms hydrogen bonds with D66<sup>2.50</sup>, S106<sup>3.39</sup>, and  
550 S276<sup>7.45</sup>. **c**, Superimposition of the ET<sub>B</sub> and BLT1 structures in complex with the inverse  
551 agonists.

552

553

554

555

556

557

558

559

560

561

562

563 **Supplementary Figure Legends**

564 **Supplementary Fig. 1. Crystallization.**

565 **a**, Gel filtration chromatogram and SDS-PAGE of the purified IRL2500-bound ET<sub>B</sub>  
566 receptor. **b**, Crystals of the IRL2500-bound ET<sub>B</sub> receptor.

567

568 **Supplementary Fig. 2. Comparison of the ECL2 structure with those of**  
569 **other peptide-activated GPCRs.**

570 **a**, Superimposition of the ET<sub>B</sub> structures determined to date. The IRL2500-bound and  
571 other structures are coloured sky blue and gray, respectively. **b**, Superimposition of the  
572 IRL2500-bound ET<sub>B</sub> structure with other peptide-activated class A GPCRs.

573

574 **Supplementary Fig. 3. Electron density.**

575 **a**,  $F_o - F_c$  omit maps for IRL2500, contoured at  $3.0\sigma$ . **b**,  $2F_o - F_c$  map around the IRL2500  
576 binding site, contoured at  $2.5\sigma$ .

577

578 **Supplementary Fig. 4. Alignment of the human ET<sub>A</sub> and ET<sub>B</sub> receptors.**

579 Alignment of the amino acid sequences of the human ET<sub>B</sub> receptor (UniProt ID: P24530)  
580 and the human ET<sub>A</sub> receptor (P25101). Secondary structure elements for  $\alpha$ -helices and  $\beta$ -  
581 strands are indicated by cylinders and arrows, respectively. Conservation of the residues  
582 between ET<sub>A</sub> and ET<sub>B</sub> is indicated as follows: red panels for completely conserved; red

583 letters for partially conserved; and black letters for not conserved. The residues involved  
584 in IRL2500 binding are indicated with squares.

585

586 **Supplementary Fig. 5. ET-1 responses of mutant receptors.**

587 Concentration response-curves of AP-TGF $\alpha$  release in the ET-1 treatment of HEK293  
588 cells expressing the endothelin receptors. Symbols and error bars are means and s.e.m.  
589 (standard error of the mean) of four or six independent experiments, each performed in  
590 triplicate.



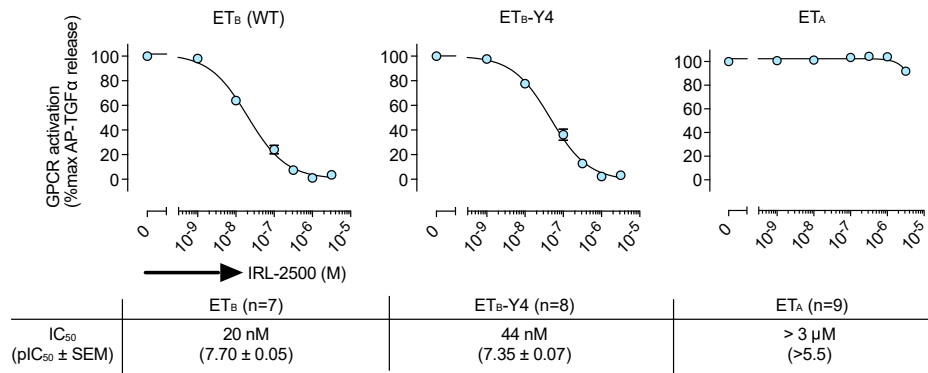

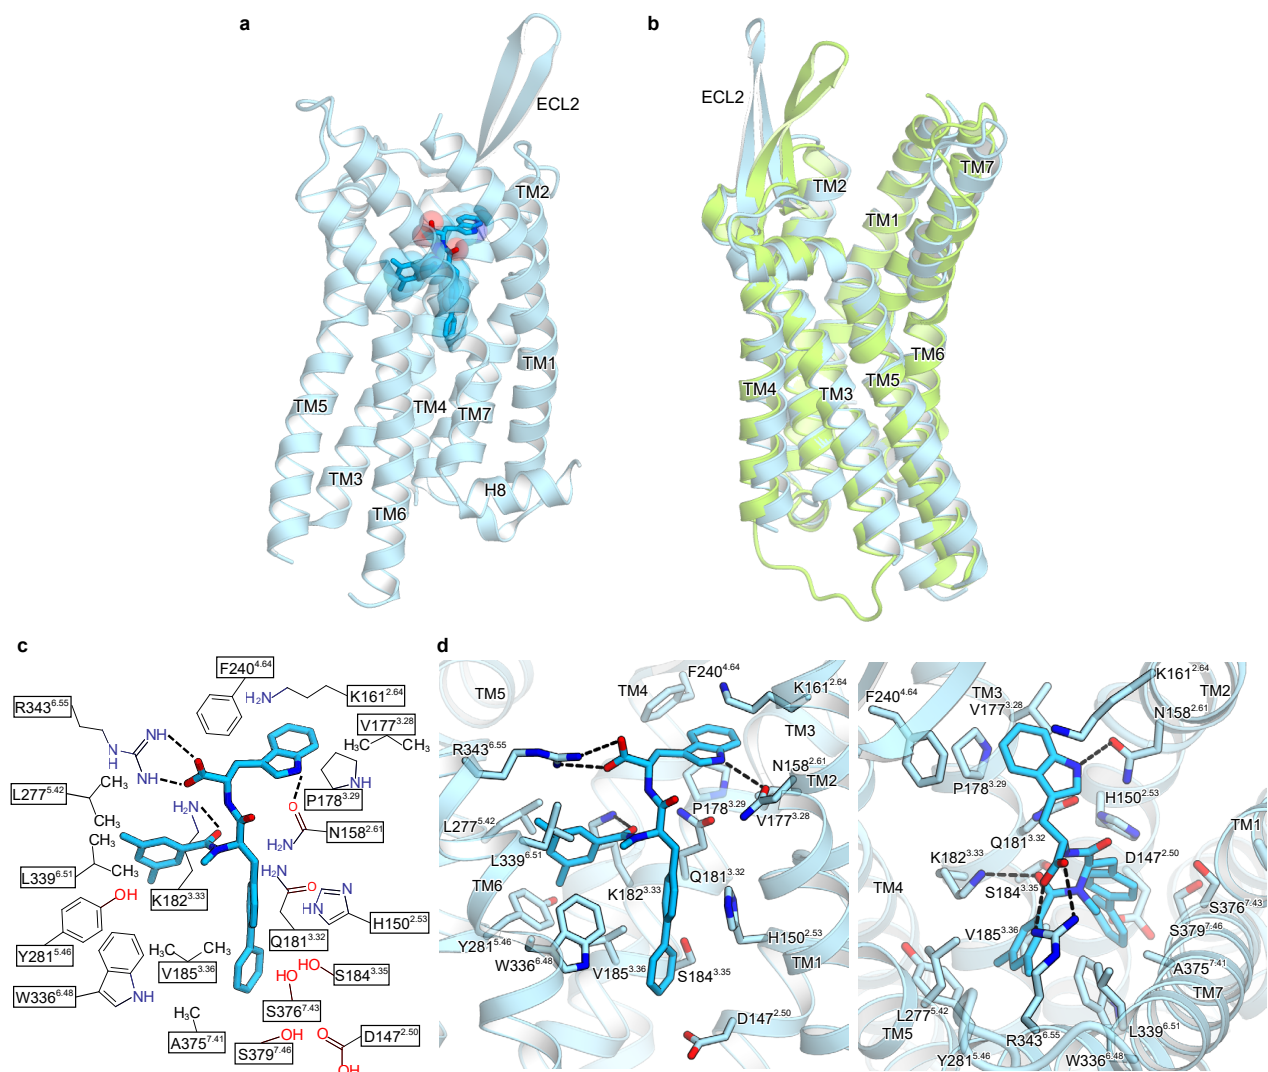

Nagiri et al. Figure 2

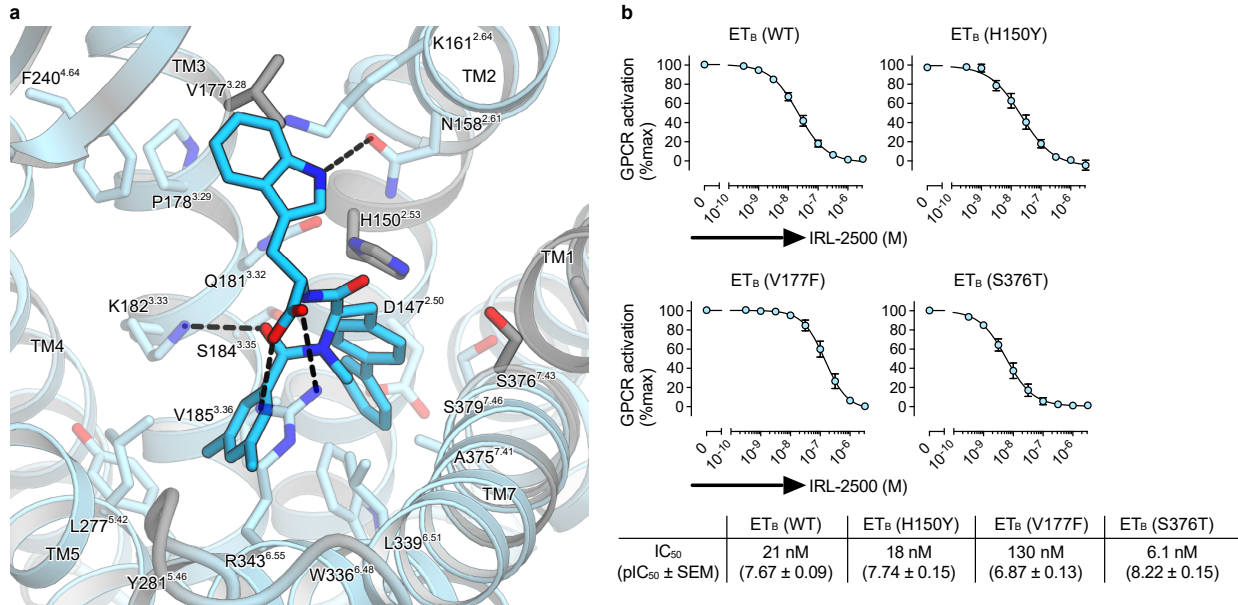

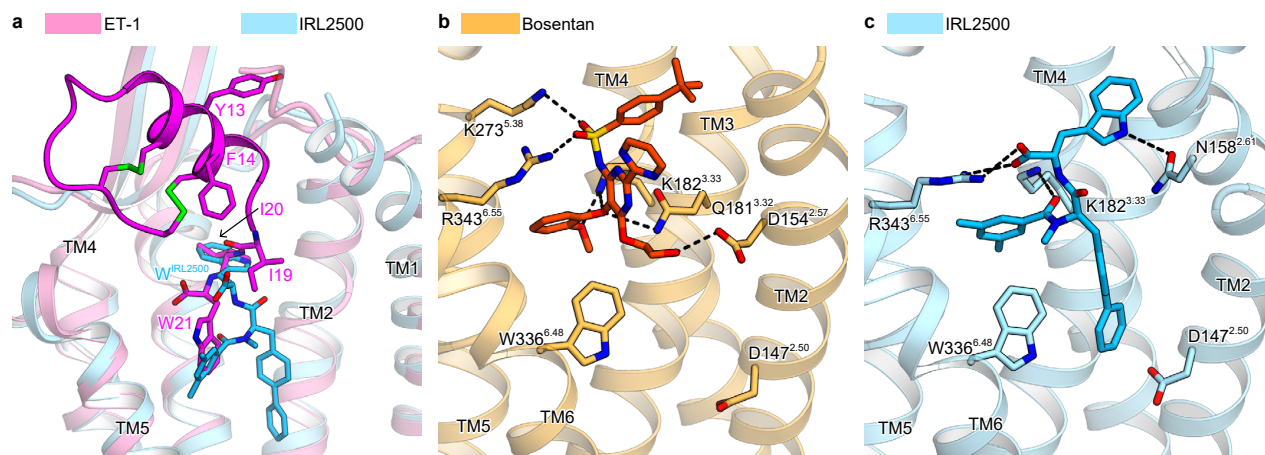

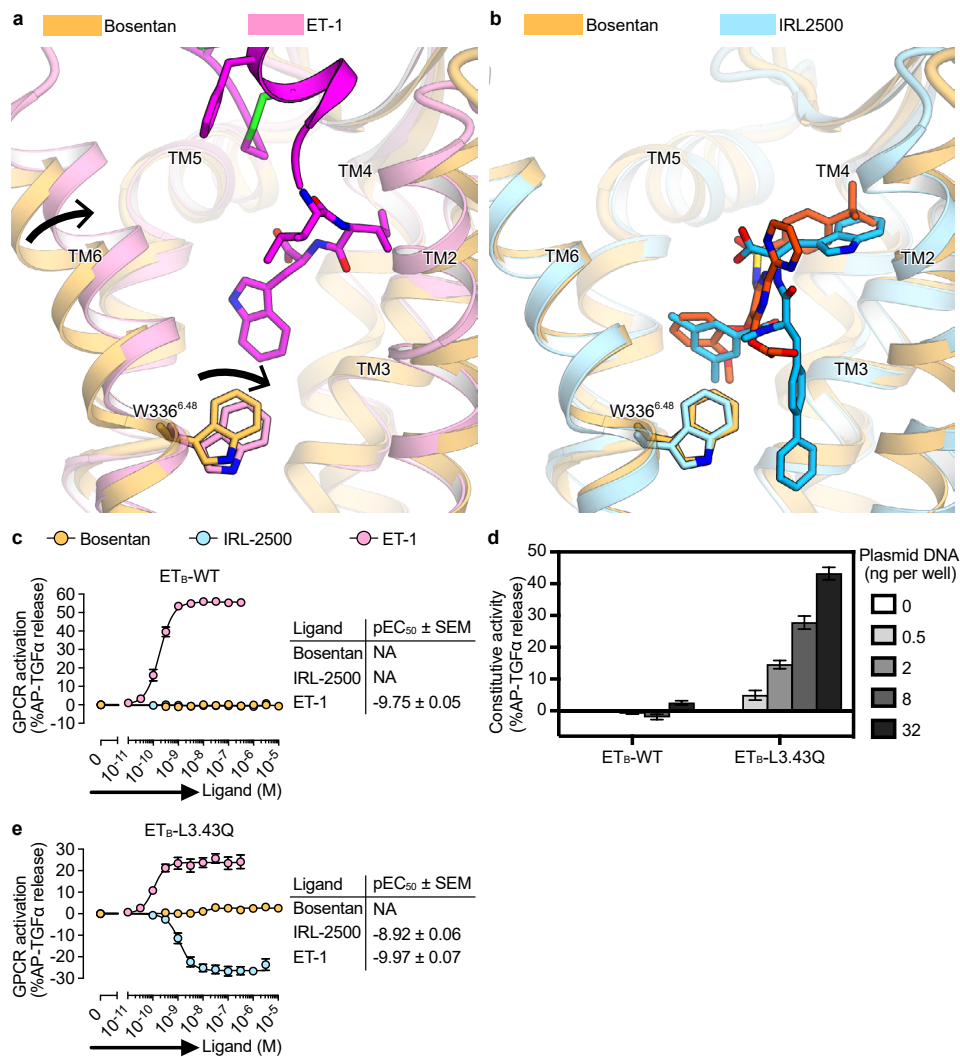

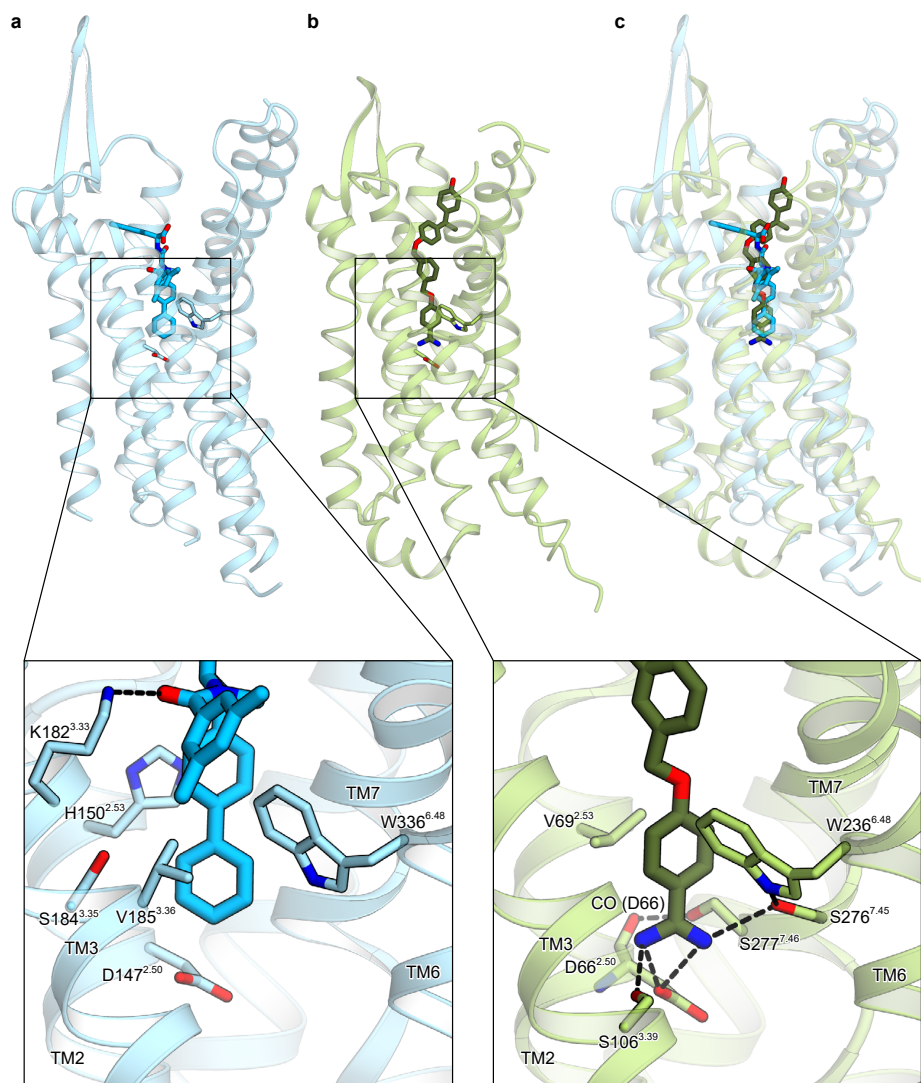

| IRL2500-ET <sub>B</sub>                             |                         |
|-----------------------------------------------------|-------------------------|
| <b>Data collection</b>                              |                         |
| Space group                                         | <i>I</i> 422            |
| Cell dimensions                                     |                         |
| <i>a</i> , <i>b</i> , <i>c</i> (Å)                  | 110.0, 110.0, 291.7     |
| $\alpha$ , $\beta$ , $\gamma$ (°)                   | 90, 90, 90              |
| Resolution (Å)*                                     | 43.88-2.70 (2.797-2.70) |
| <i>R</i> <sub>meas</sub> *                          | 0.295 (3.946)           |
| $\langle I/\sigma(I) \rangle$ *                     | 10.74 (1.08)            |
| CC <sub>1/2</sub> *                                 | 0.995 (0.798)           |
| Completeness (%)*                                   | 99.66 (99.35)           |
| Redundancy*                                         | 19.3 (19.6)             |
| <b>Refinement</b>                                   |                         |
| Resolution (Å)                                      | 43.88-2.70              |
| No. reflections                                     | 25,069                  |
| <i>R</i> <sub>work</sub> / <i>R</i> <sub>free</sub> | 0.2244 / 0.2628         |
| No. atoms                                           |                         |
| Protein                                             | 3256                    |
| Ligand                                              | 43                      |
| Water/Ion/Lipid                                     | 181                     |
| Averaged <i>B</i> -factors (Å <sup>2</sup> )        |                         |
| Protein                                             | 82.9                    |
| Ligand/ion                                          | 52.3                    |
| Water                                               | 87.7                    |
| R.m.s. deviations from ideal                        |                         |
| Bond lengths (Å)                                    | 0.004                   |
| Bond angles (°)                                     | 0.92                    |
| Ramachandran plot                                   |                         |
| Favored (%)                                         | 97.77                   |
| Allowed (%)                                         | 2.23                    |
| Outlier (%)                                         | 0                       |

\*Values in parentheses are for highest-resolution shell.



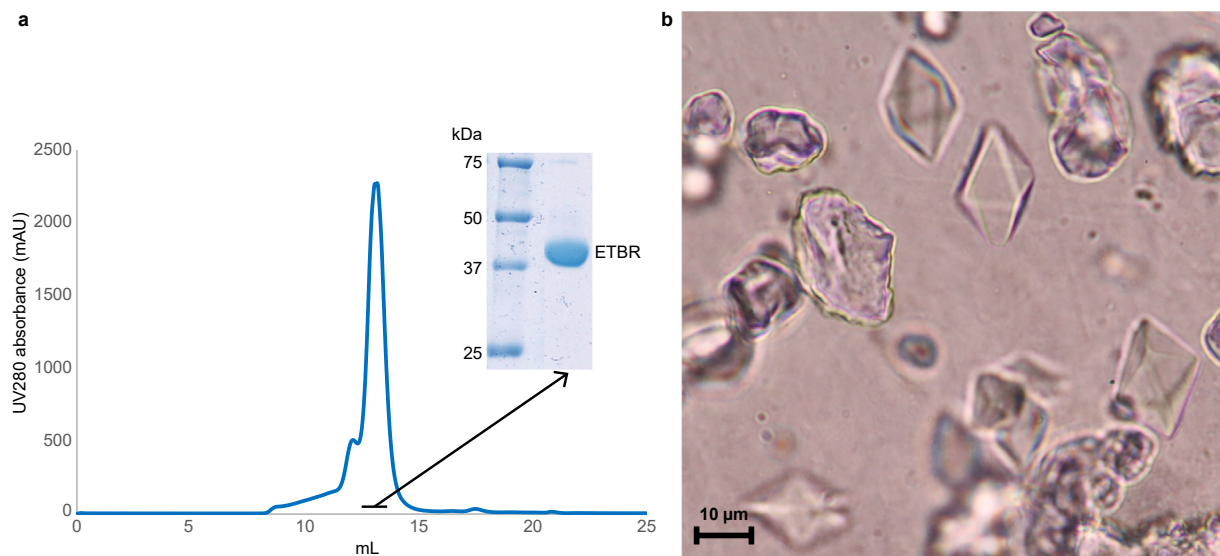



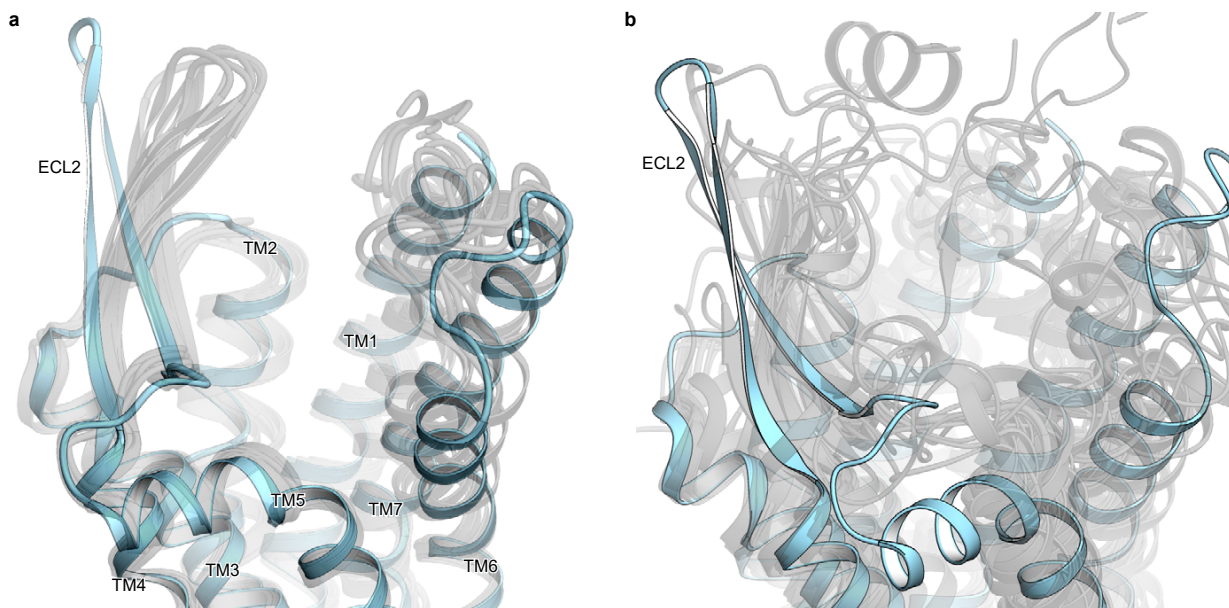

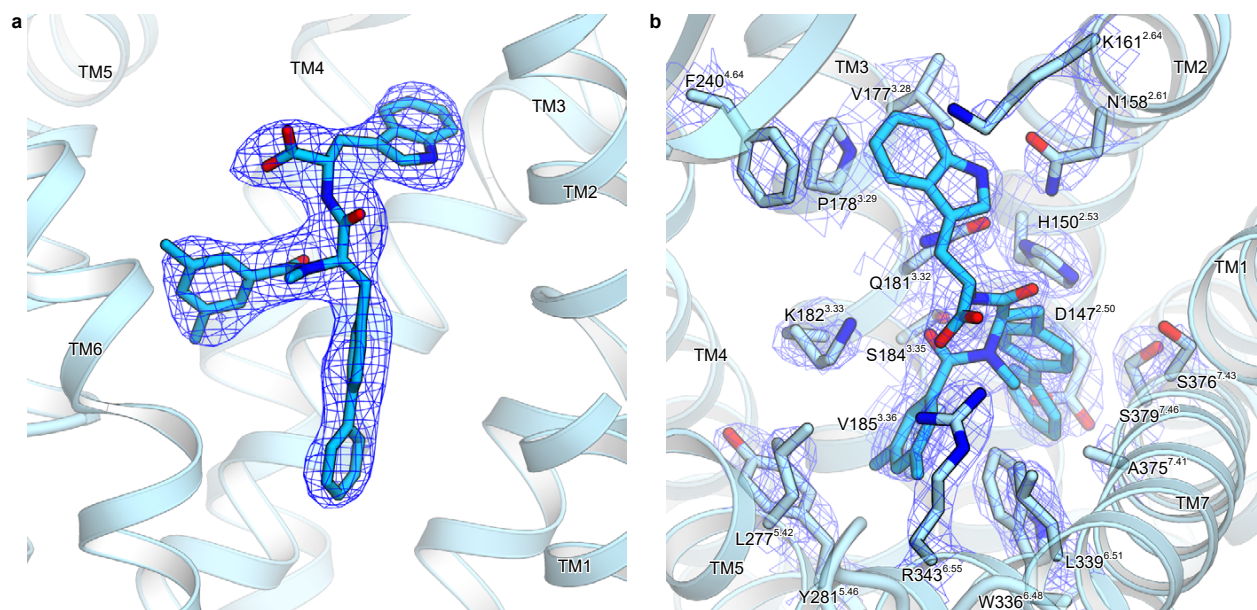

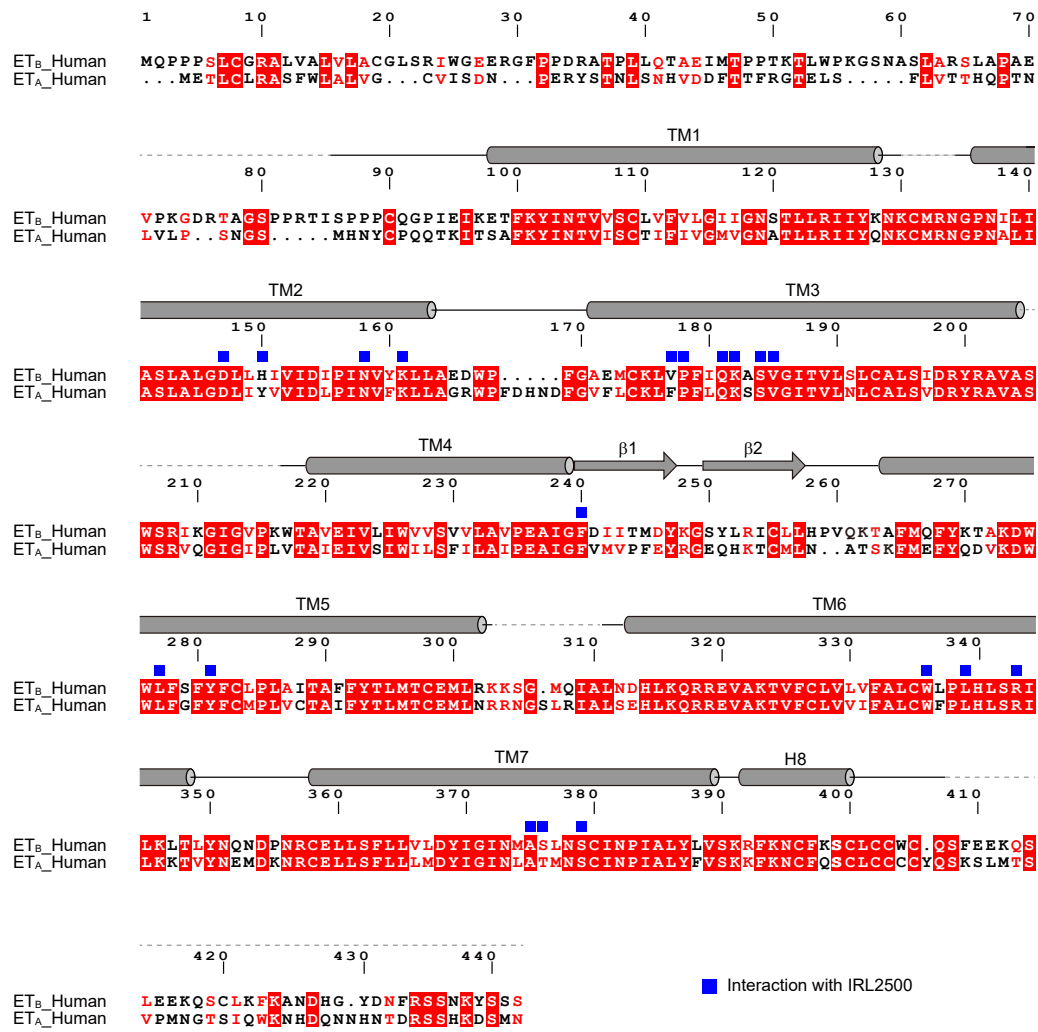

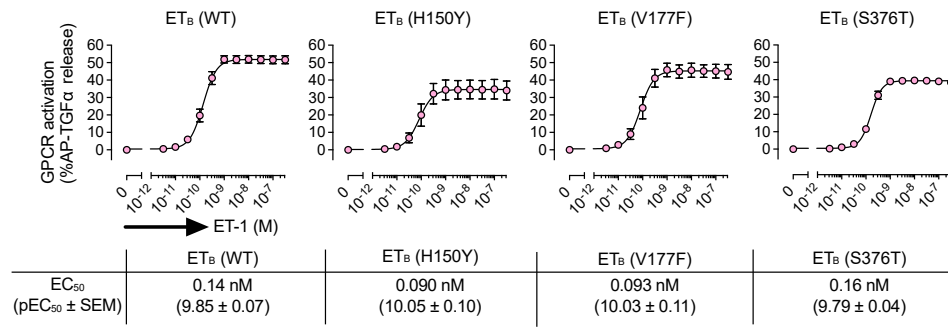

Source: https://www.biorxiv.org/content/10.1101/460410v1.full.pdf
